# Supplementary material
Source: Springer Nature journal article supplement (https://www.springermedizin.de/resource/supplementary/13054_2013_2216_MOESM4_ESM.pdf/9713840)

**A**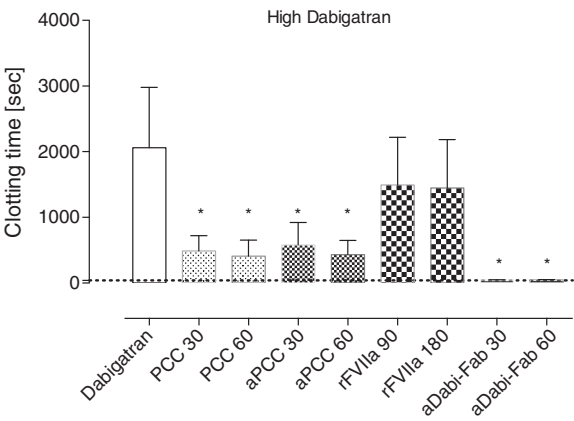**B**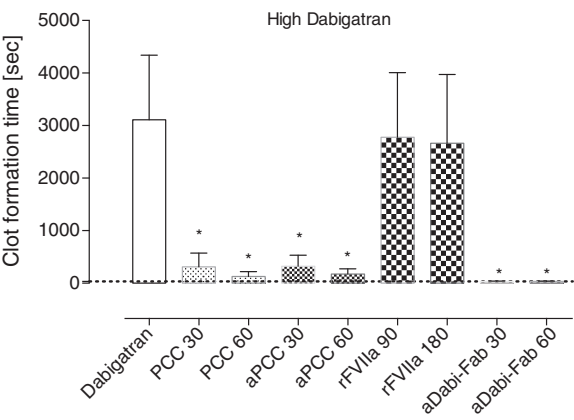**C**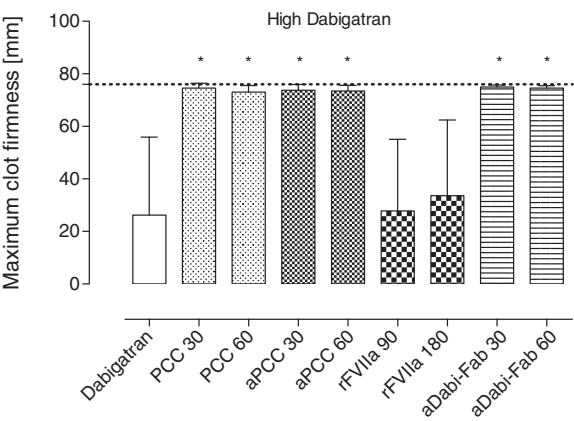

Supplement: MOESM4 [file 9713840]
